# Supplementary material
Source: HighWire-hosted journal article supplement (https://ard.bmj.com/content/79/9/1255)

Table S1 Original data for Figure 1

| Patient No                         |               | 1    | 2    | 3     | 4    | 5    | 6    | 7    | 8    | 9     | 10    | 11   | 12   |
|------------------------------------|---------------|------|------|-------|------|------|------|------|------|-------|-------|------|------|
| Before<br>tofacitinib<br>treatment | ESR (mm/h)    | 16   | 16   | 28    | 14   | 6    | 21   | 46   | 13   | 29    | 29    | 26   | 14   |
|                                    | hs-CRP (mg/L) | 6.29 | 6.27 | 24.75 | 4.50 | 1.49 | 5.19 | 5.33 | 7.50 | 15.39 | 11.83 | 13.7 | 5.8  |
|                                    | VAS           | 7    | 4    | 10    | 6    | 6    | 4    | 7    | 5    | 8     | 5     | 6    | 4    |
|                                    | HAQ-DI        | 0.70 | 0.15 | 0     | 0.65 | 0.60 | 0.05 | 0    | 0.60 | 1.80  | 0.90  | 0.30 | 0.25 |
|                                    | BASDAI        | 5.2  | 3.0  | -     | -    | -    | -    | -    | 3.5  | 7.4   | -     | -    | 1.8  |
|                                    | BASFI         | 4.8  | 1.1  | -     | -    | -    | -    | -    | 1.2  | 2.8   | -     | -    | 1.2  |
| After<br>tofacitinib<br>treatment  | ESR (mm/h)    | 10   | 13   | 13    | 11   | 2    | 7    | 33   | 7    | 9     | 16    | 10   | 4    |
|                                    | hs-CRP (mg/L) | 2.66 | 3.61 | 4.05  | 0.71 | 0.91 | 0.28 | 4.50 | 3.16 | 0.74  | 1.12  | 4.27 | 0.24 |
|                                    | VAS           | 1    | 2    | 3     | 3    | 2    | 0    | 8    | 2    | 5     | 1     | 0    | 1    |
|                                    | HAQ-DI        | 0.65 | 0.15 | 0     | 0.55 | 0.30 | 0.05 | 0.05 | 0.60 | 0.45  | 0     | 0.25 | 0    |
|                                    | BASDAI        | 1.0  | 1.9  | -     | -    | -    | -    | -    | 1.6  | 4.2   | -     | -    | 0.1  |
|                                    | BASFI         | 1.0  | 0.5  | -     | -    | -    | -    | -    | 0.0  | 1.1   | -     | -    | 0.0  |

Table S2 Demographics and MRI manifestations of patients with SAPHO syndrome

| No. | Sex | Age | Disease duration (years) | Follow-up (months) | Lesions shown by MRI                                      | Response to tofacitinib observed MRI | Figure in      |
|-----|-----|-----|--------------------------|--------------------|-----------------------------------------------------------|--------------------------------------|----------------|
| 1   | F   | 41  | 4.5                      | 3.3                | Bilateral sternoclavicular joints and sternum; L4-5       | Moderate                             | Fig S1a, S1b   |
| 2   | F   | 53  | 7.6                      | 4.1                | Sternum; L1-2                                             | Mild                                 | Fig S2a, S2b   |
| 3   | F   | 33  | 17.5                     | 1.9                | Right frontotemporal junction                             | Mild                                 | Fig S3a, S3b   |
| 4   | F   | 45  | 7.2                      | 3.6                | Right talus, calcaneus, navicular bone, cuboid, and tibia | Moderate                             | Fig S4a, S4b   |
| 5   | F   | 38  | 2.3                      | 3.2                | Bilateral 1 <sup>st</sup> sternocostal joints             | Moderate                             | Fig S5a, S5b   |
| 6   | F   | 22  | 14.0                     | 2.8                | Left distal radius and carpal bones                       | Mild                                 | Fig S6a, S6b   |
| 7   | F   | 56  | 16.0                     | 2.7                | Bilateral mandible                                        | None                                 | Fig S7a, S7b   |
| 8   | F   | 37  | 11.0                     | 3.6                | Left 1 <sup>st</sup> sternocostal joint; T6               | None                                 | Fig S8a, S8b   |
| 9   | F   | 28  | 1.0                      | 4.6                | ACW; T5-6, L1                                             | Moderate                             | Fig S9a, S9b   |
| 10  | F   | 33  | 1.0                      | 3.4                | Bilateral 1 <sup>st</sup> sternocostal joints             | Moderate                             | Fig S10a, S10b |
| 11  | F   | 54  | 1.0                      | 2.8                | Left clavicle and sternum                                 | None                                 | Fig S11a, S11b |
| 12  | F   | 33  | 0.3                      | 3.5                | T7-9                                                      | Moderate                             | Fig S12a, S12b |

Fig S1a. Baseline

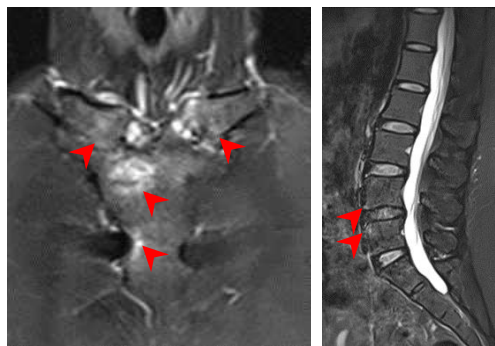

Fig S1b. After treatment

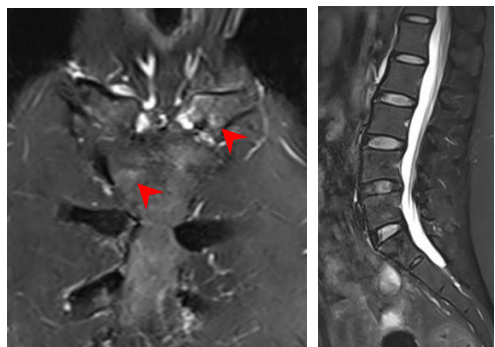

Fig S2a. Baseline

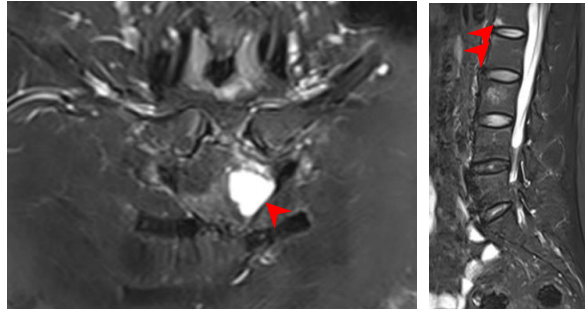

Fig S2b. After treatment

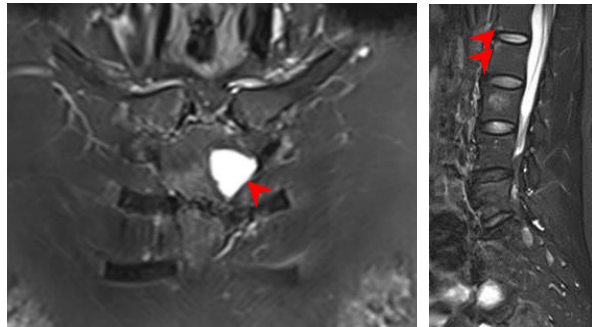

Fig S3a. Baseline

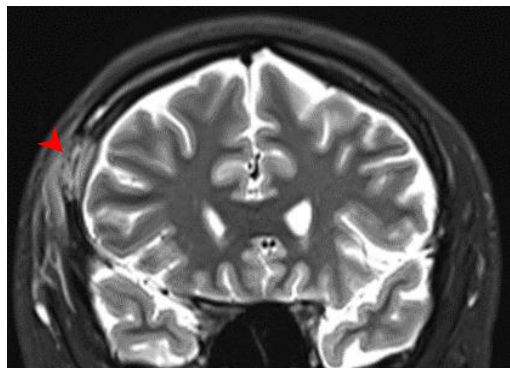

Fig S3b. After treatment

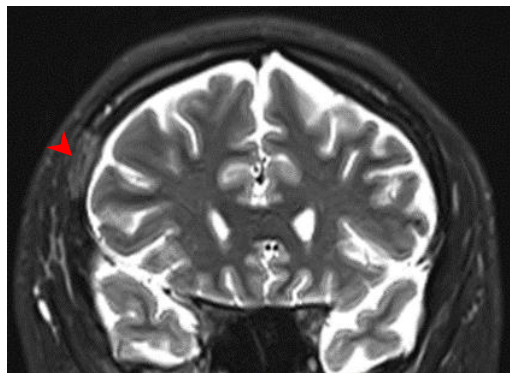

Fig S4a. Baseline

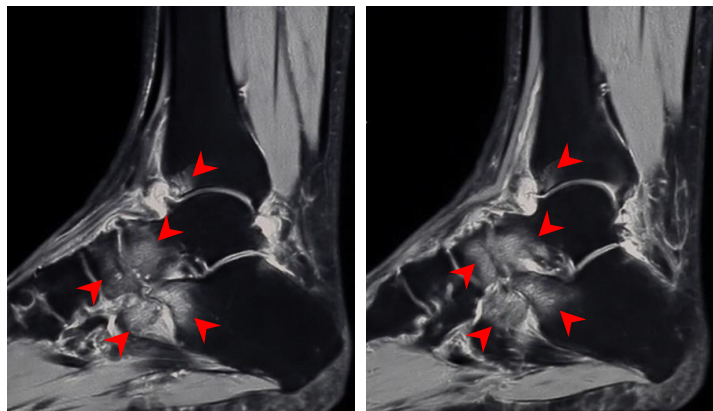

Fig S4b. After treatment

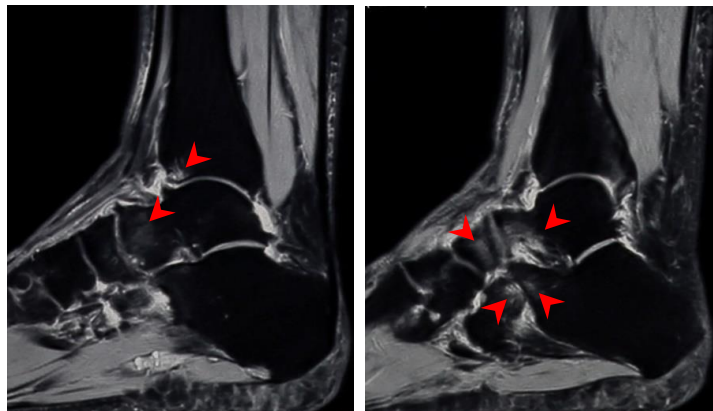

Fig S5a. Baseline

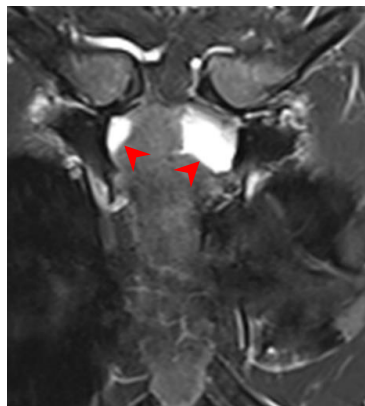

Fig S5b. After treatment

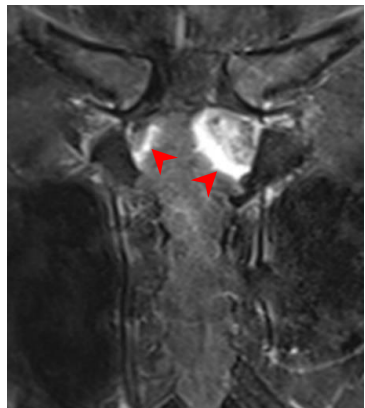

Fig S6a. Baseline

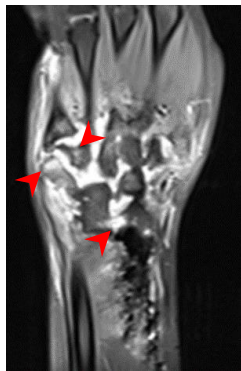

Fig S6b. After treatment

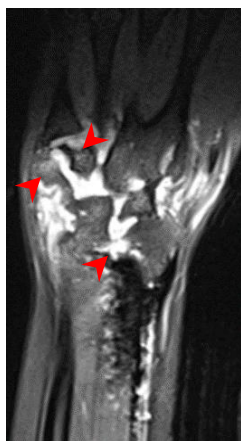



Fig S7a. Baseline

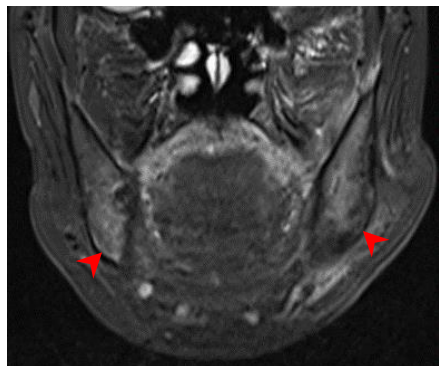

Fig S7b. After treatment

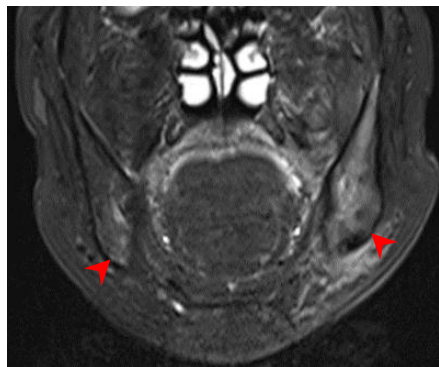

Fig S8a. Baseline

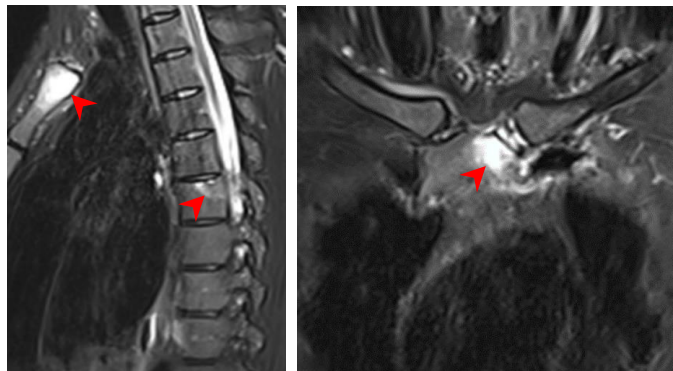

Fig S8b. After treatment

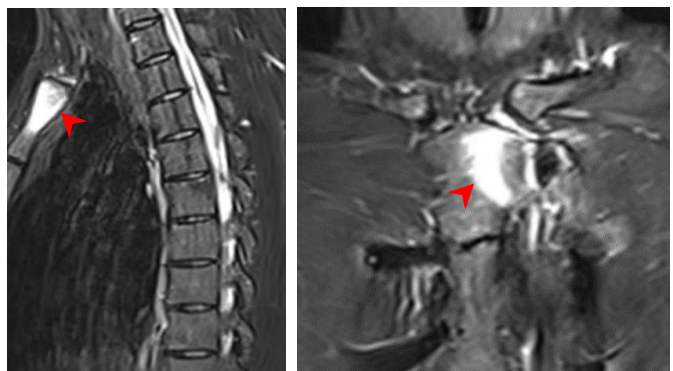

Fig S9a. Baseline

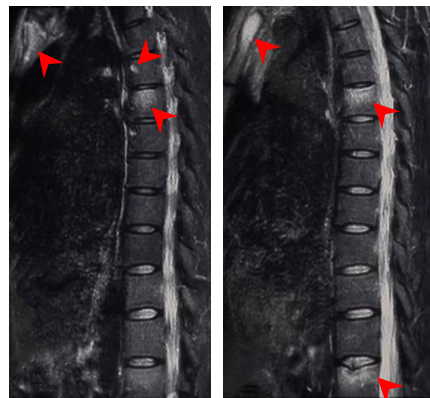

Fig S9b. After treatment

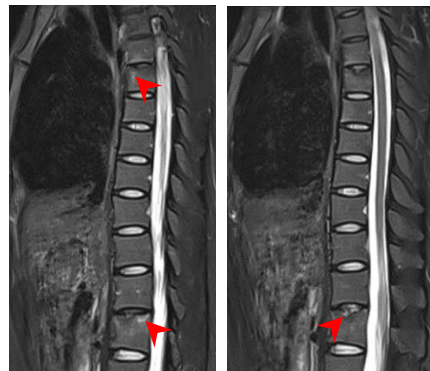

Fig S10a. Baseline

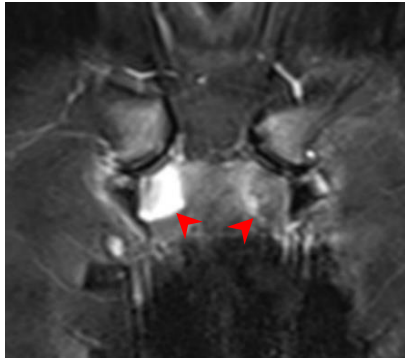

Fig S10b. After treatment

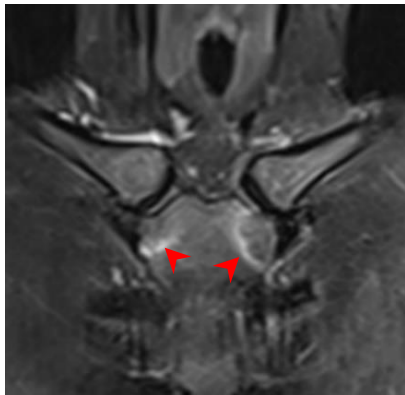

Fig S11a. Baseline

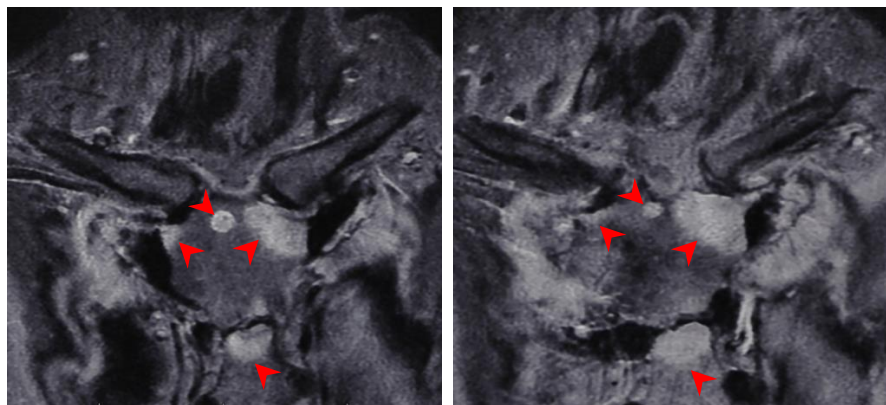

Fig S11b. After treatment

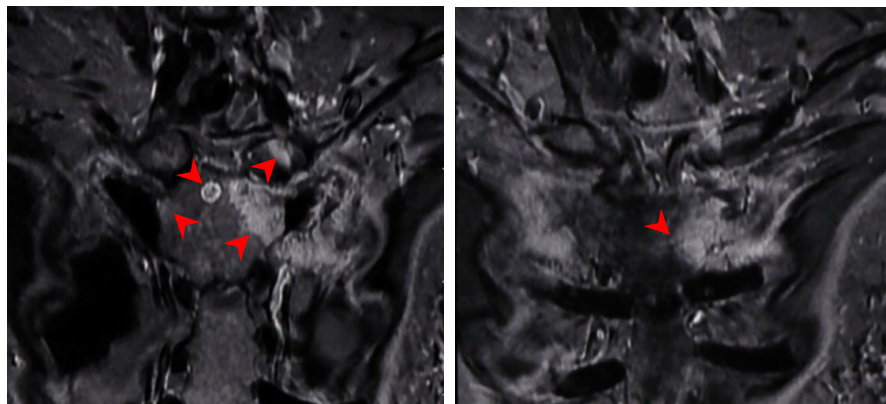

Fig S12a. Baseline

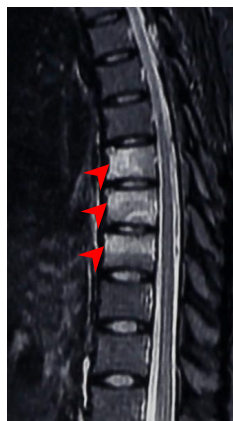

Fig S12b. After treatment

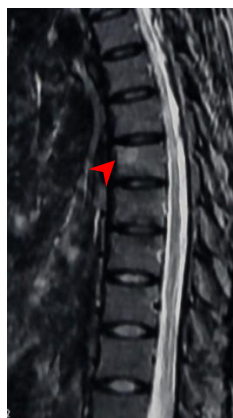

Supplement: inline-supplementary-material-1 [file inline-supplementary-material-1.pdf]
